# Supplementary material for: rs641738C>T near MBOAT7 is associated with liver fat, ALT and fibrosis in NAFLD: A meta-analysis
Source: PubMed Central journal article supplement (PMC7755037; doi:10.1016/j.jhep.2020.08.027), 2021-01
Supplement: mmc2.pdf [file mmc2.pdf]

## Journal of Hepatology

### CTAT methods

Tables for a “Complete, Transparent, Accurate and Timely account” (CTAT) are now mandatory for all revised submissions. The aim is to enhance the reproducibility of methods.

- Only include the parts relevant to your study
- Refer to the CTAT in the main text as ‘Supplementary CTAT Table’
- Do not add subheadings
- Add as many rows as needed to include all information
- Only include one item per row

**If the CTAT form is not relevant to your study, please outline the reasons why:**

|  |
|--|
|  |
|--|

#### 1.1 Antibodies

| Name | Citation | Supplier | Cat no. | Clone no. |
|------|----------|----------|---------|-----------|
|      |          |          |         |           |

#### 1.2 Cell lines

| Name | Citation | Supplier | Cat no. | Passage no. | Authentication test method |
|------|----------|----------|---------|-------------|----------------------------|
|      |          |          |         |             |                            |

#### 1.3 Organisms

| Name | Citation | Supplier | Strain | Sex | Age | Overall n number |
|------|----------|----------|--------|-----|-----|------------------|
|      |          |          |        |     |     |                  |

#### 1.4 Sequence based reagents

| Name | Sequence | Supplier |
|------|----------|----------|
|      |          |          |

#### 1.5 Biological samples

| Description | Source | Identifier |
|-------------|--------|------------|
|             |        |            |

#### 1.6 Deposited data

| Name of repository | Identifier | Link |
|--------------------|------------|------|
|                    |            |      |

## 1.7 Software

| Software name | Manufacturer                               | Version |
|---------------|--------------------------------------------|---------|
| R             | The R Foundation for Statistical Computing | 3.6.1   |
| STATA         | StataCorp                                  | v14     |

## 1.8 Other (e.g. drugs, proteins, vectors etc.)

|  |  |  |
|--|--|--|
|  |  |  |
|  |  |  |

## 1.9 Please provide the details of the corresponding methods author for the manuscript:

Dr Jake P. Mann, University of Cambridge, Institute of Metabolic Science, Addenbrooke's Hospital, Cambridge, United Kingdom. jm2032@cam.ac.uk, Tel: +44 1223 336792

## 2.0 Please confirm for randomised controlled trials all versions of the clinical protocol are included in the submission. These will be published online as supplementary information.

|  |
|--|
|  |
|--|
